# Supplementary material
Source: publisher figshare collection journal article supplement (https://acs.figshare.com/ndownloader/files/26487789)
Supplement: Supplementary file 1 [file 26487789]

Mutagenic and Cancer Risk Estimation of particulate bound  
Polycyclic Aromatic Hydrocarbons (PAHs) from the  
Emission of different Biomass Fuels

*Puneet Kumar Verma, Dinesh Sah, Jitendra Dubey, K Maharaj Kumari*

*and Anita Lakhani\**

Department of Chemistry, Dayalbagh Educational Institute, Dayalbagh, Agra – 282005, Uttar  
Pradesh, India

**ASSOCIATED CONTENT**

Figure S1: Representative dose-response plot for different fuel combustion based on Ames assay with and without activation

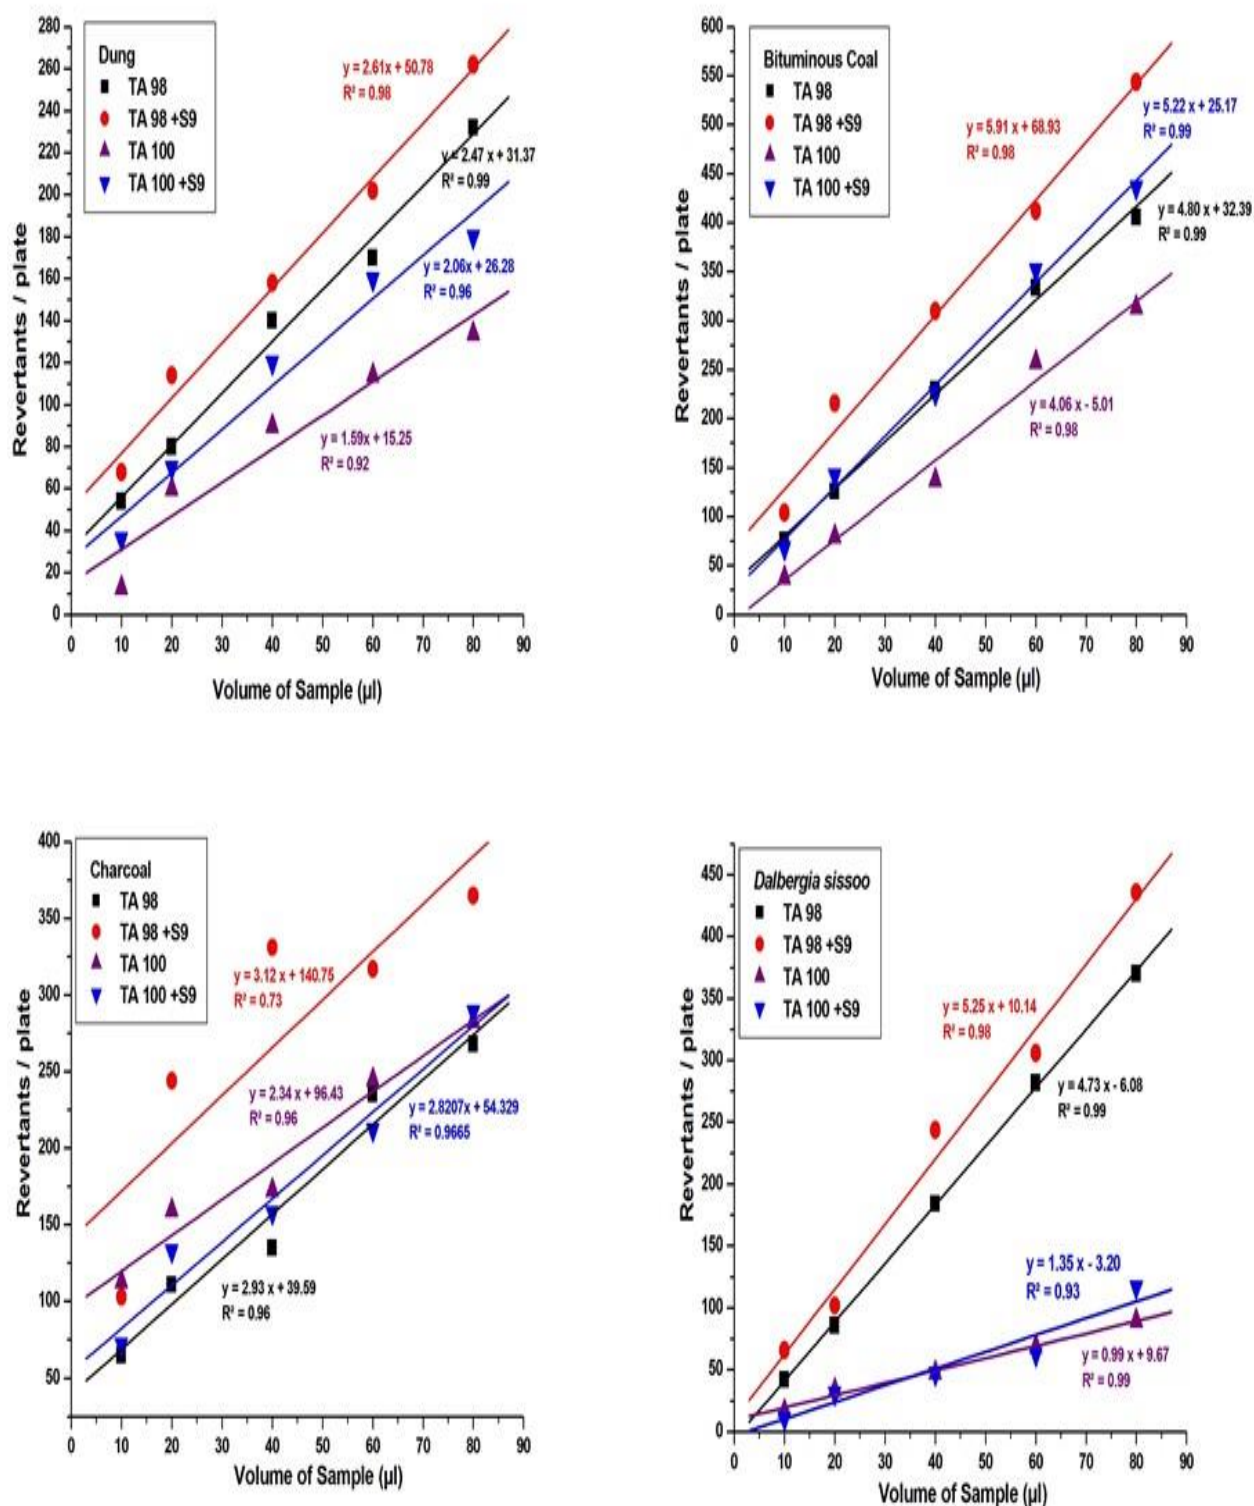

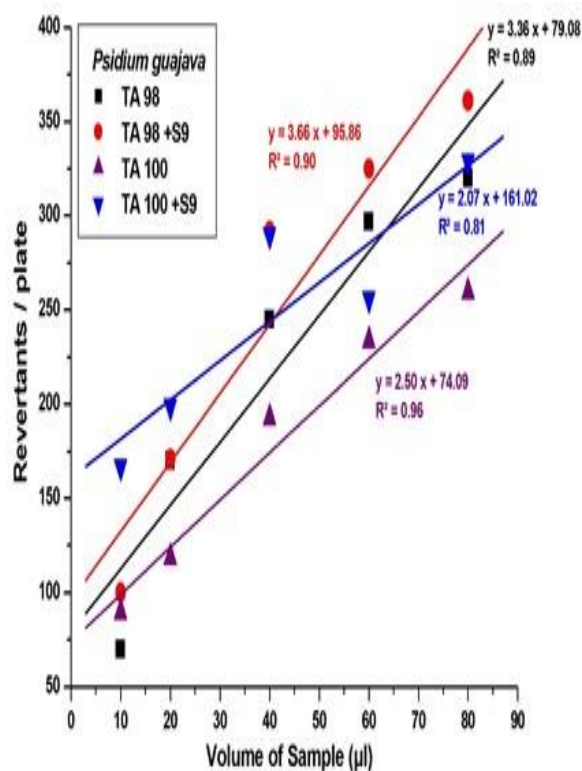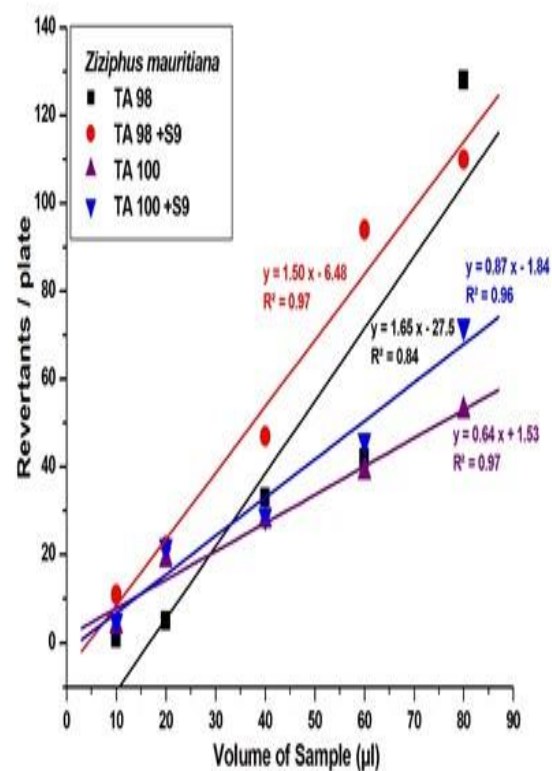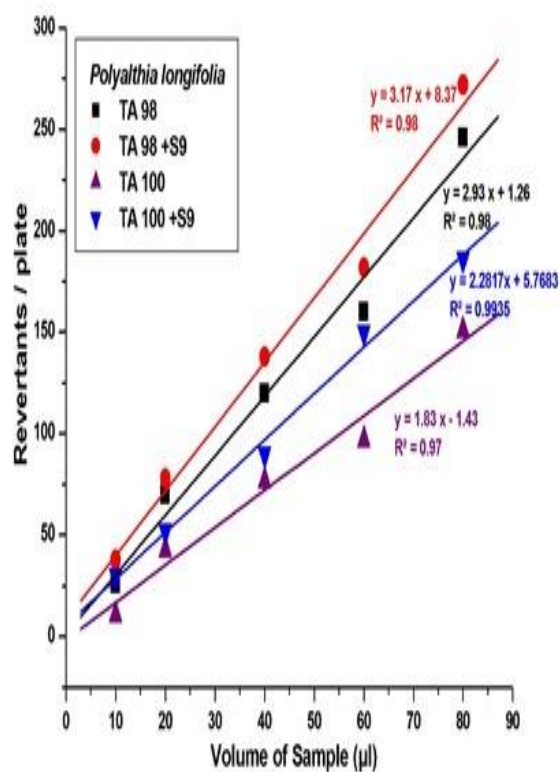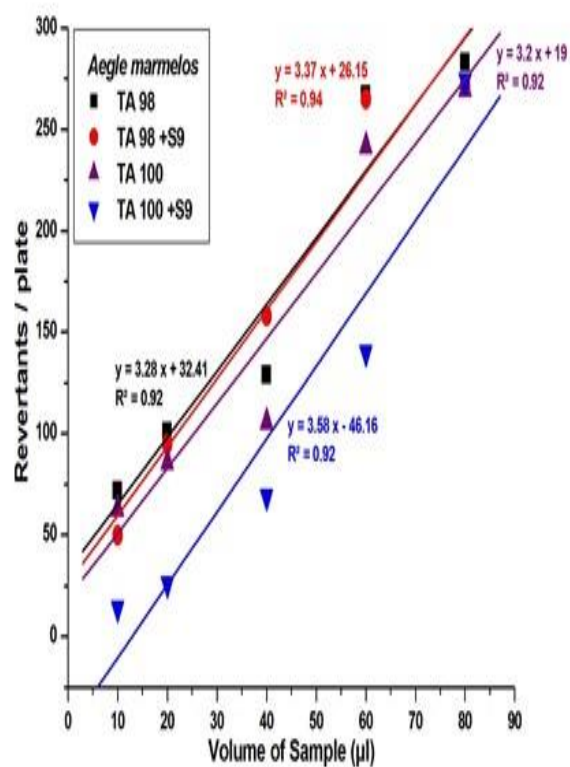

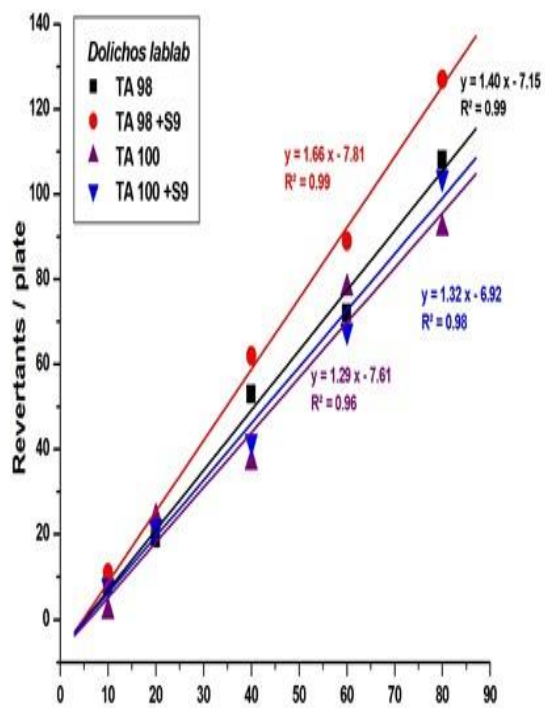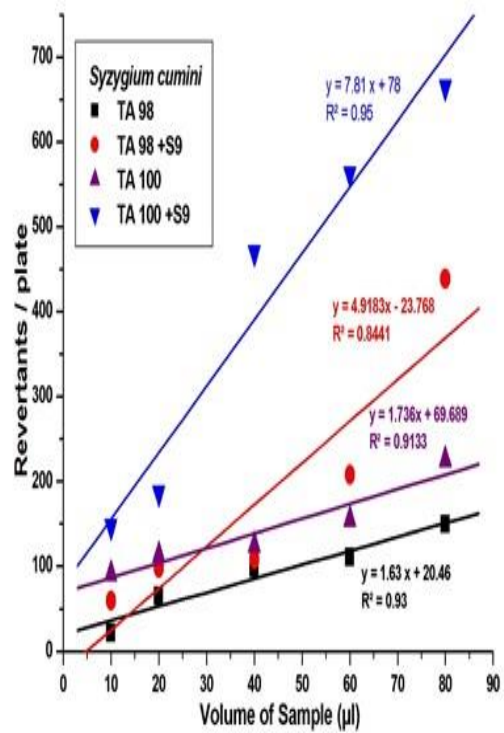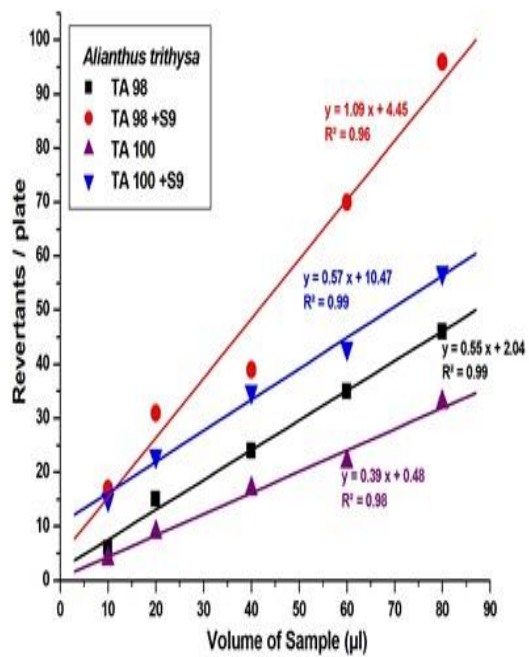

Table S1: BaP Toxic Equivalent factors of PAHs

| PAHs  | TEF   |
|-------|-------|
| Nap   | 0.001 |
| Acy   | 0.001 |
| Ace   | 0.001 |
| Fluo  | 0.001 |
| Phen  | 0.001 |
| Anth  | 0.01  |
| Fla   | 0.001 |
| Pyr   | 0.001 |
| BaA   | 0.1   |
| Chy   | 0.01  |
| BaP   | 1     |
| IP    | 0.1   |
| DbA   | 5     |
| BghiP | 0.01  |
